# Supplementary material for: Growth of single-crystal copper sulfide thin films via electrodeposition in ionic liquid media for lithium ion batteries
Source: Royal Society of Chemistry journal article supplement (doi:10.1039/c2jm16692e), 2012-01-01

### Supplementary Information:

Different experimental parameters, the molar ratio of sulphur and  $\text{Cu}(\text{TFSI})_2$  concentration, reaction time and temperature were optimized to obtain CuS thin films. The following figure shows the effects of these experimental parameters on the formation of CuS films.

**Figure SI** XRD patterns and SEM images of CuS films prepared in [EMIm]TFSI bath under different conditions: (a) different mass ratios for  $\text{Cu}(\text{TFSI})_2$  and  $\text{S}_8$ : 1:0.5, 1:1, 1:2 and 1:10 ( $T=120^\circ\text{C}$ ;  $t=1\text{h}$ ); (b) different reaction times: 30min, 60min, 90min and 4h ( $\text{Cu}(\text{TFSI})_2$ :  $\text{S}_8=1:2$ ;  $T=120^\circ\text{C}$ ); (c) different temperatures:  $120^\circ\text{C}$ ,  $150^\circ\text{C}$ ,  $180^\circ\text{C}$  and  $200^\circ\text{C}$  ( $\text{Cu}(\text{TFSI})_2$ :  $\text{S}_8=1:2$ ;  $t=60\text{min}$ ).

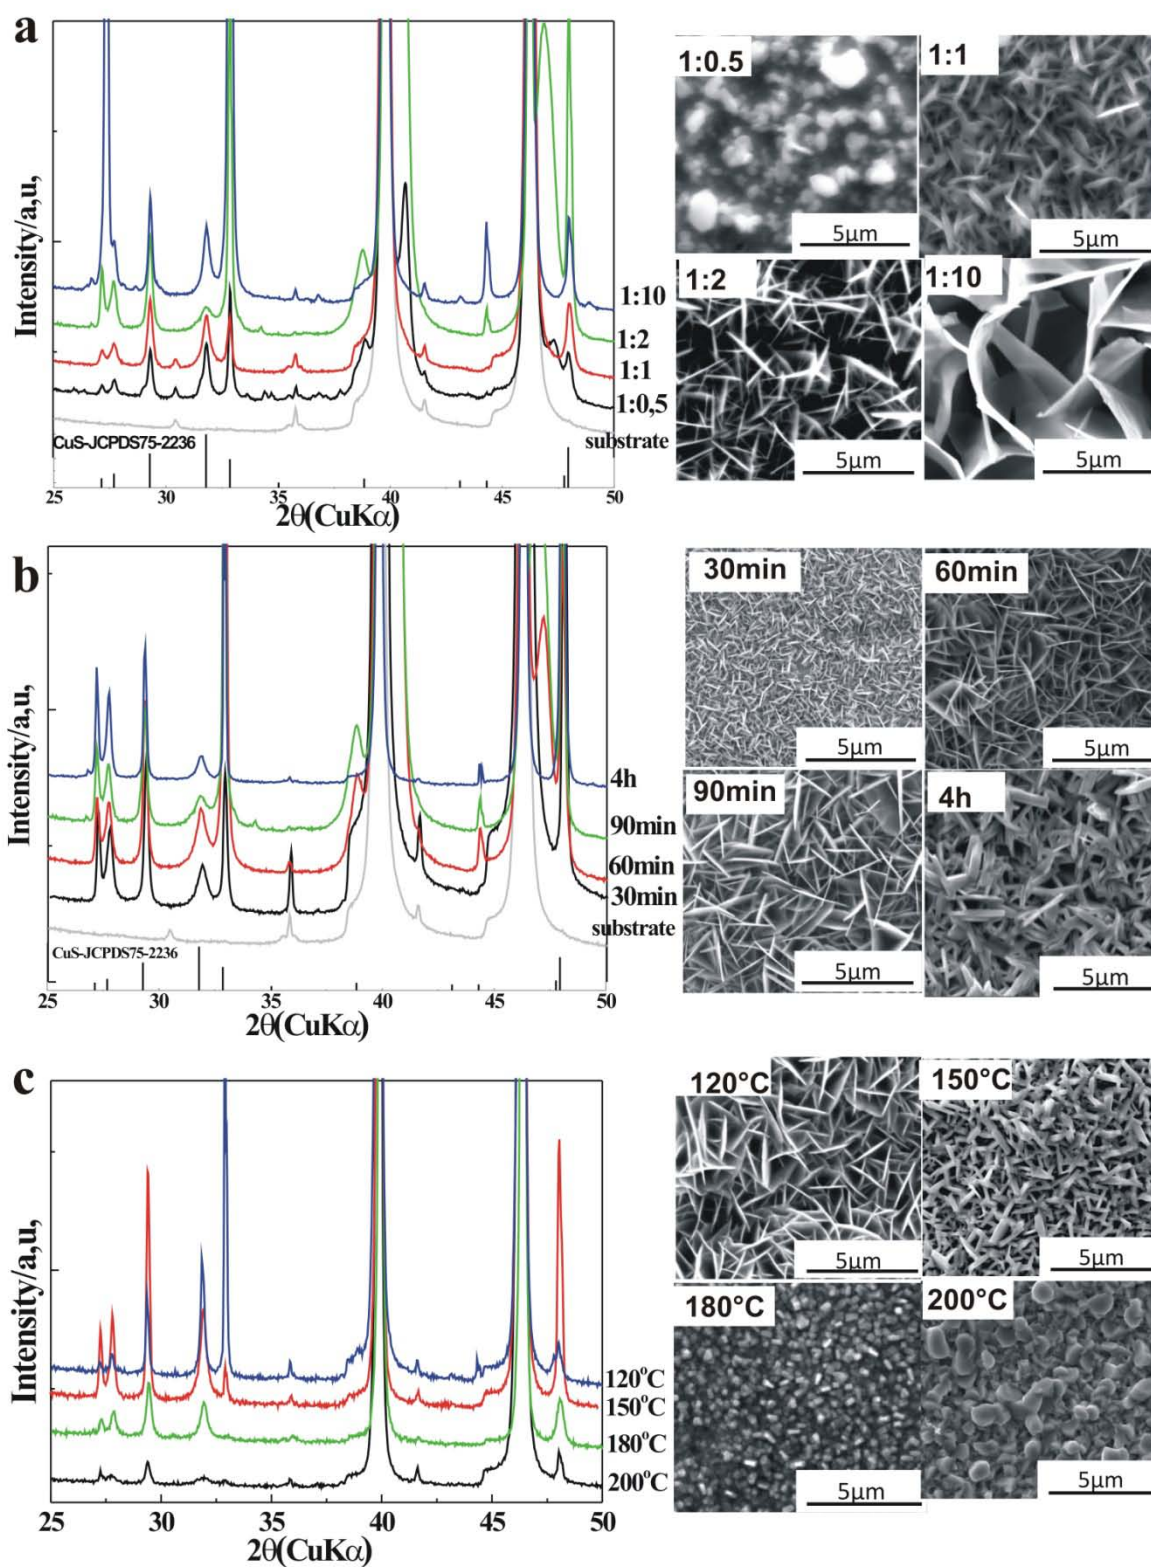

Supplement: c2jm16692e.pdf [file c2jm16692e.pdf]
